# Supplementary material for: Posttraumatic Stress Symptoms and its Association with Rumination, Thought Suppression and Experiential Avoidance: a Systematic Review and Meta-Analysis
Source: Springer Nature journal article supplement (doi:10.1007/s10862-023-10022-2), 2023-02-14
Supplement: MOESM1 [file 24028726]

Supplemental material

a. Cross-sectional study design


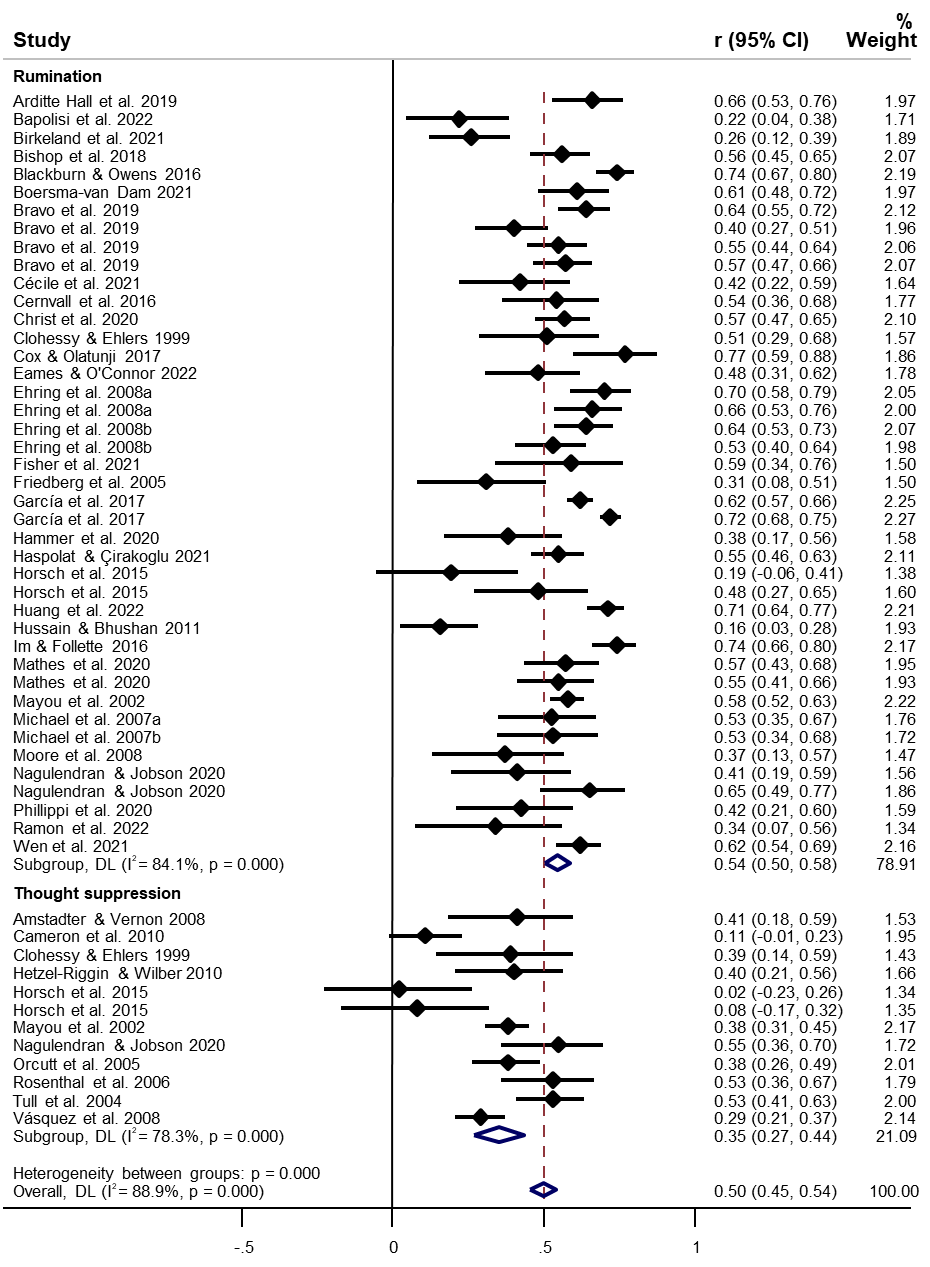


b. Longitudinal study design

*
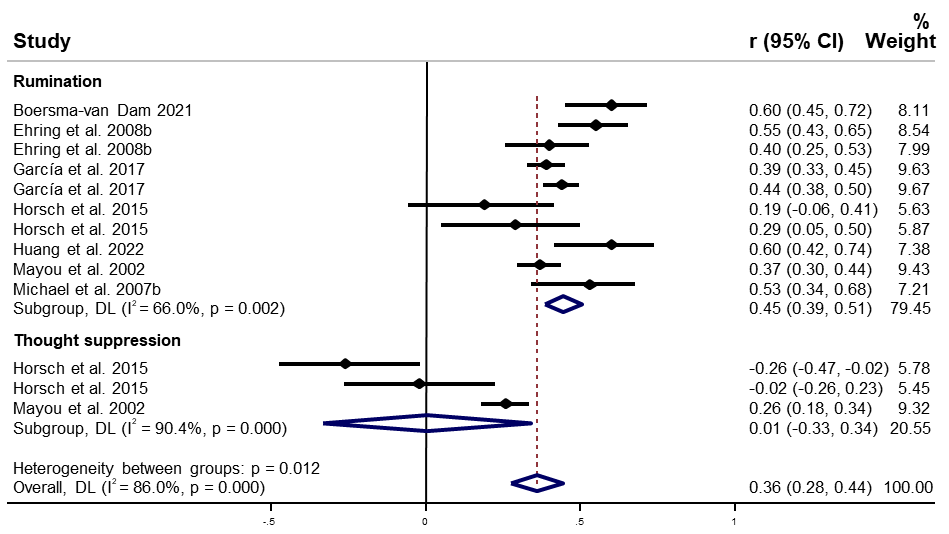
*

*Figure S1: Forest plots by study design for TS and rumination*
